# Supplementary material for: Fast and complete in situ mineralization of contaminated soils using a novel method for superoxide generation
Source: Royal Society of Chemistry journal article supplement (doi:10.1039/c4ra08015g), 2014-12-10
Supplement: c4ra08015g1.pdf [file c4ra08015g1.pdf]

### Electronic Supplementary Information

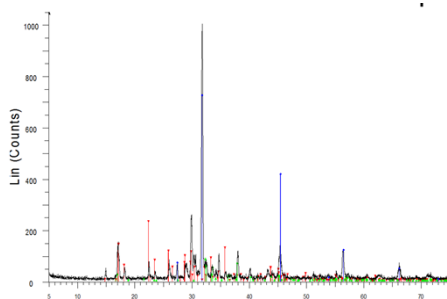

Concentrations:

NaBr(H<sub>2</sub>O)<sub>2</sub> Sodium Bromide Hydrate

Na<sub>2</sub>CO<sub>3</sub>H<sub>2</sub>O Thermonatrite

NaCl Sodium Chloride

**Figure S1:** XRD of end products of CCl<sub>3</sub>Br remediation process.

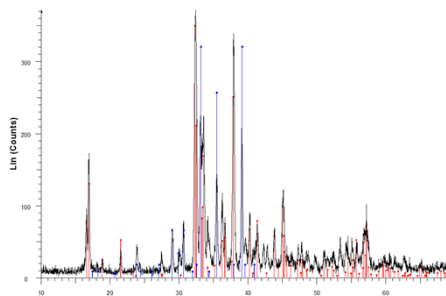

Concentrations:

Na<sub>2</sub>CO<sub>3</sub>H<sub>2</sub>O Thermonatrite

**Figure S2:** XRD of end products of xylene remediation reaction.

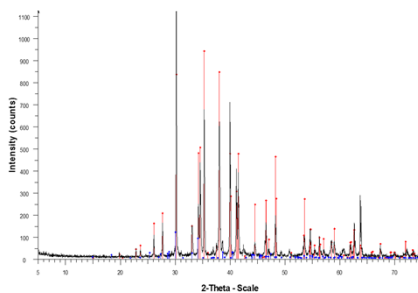

Concentrations:

Na<sub>2</sub>CO<sub>3</sub>H<sub>2</sub>O Thermonatrite

**Figure S3:** XRD of end product in diesel remediation.

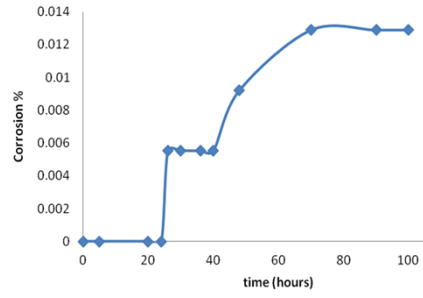

**Figure S4:** The gravimetric measurement of pipe corrosion in presence of superoxide reagent. Reaction conditions: 1mol sodium hydroxide, 2 mol hydrogen peroxide, 500 ml of water, type of metal test CS 1010, 60gram soil type A, reaction time 100 hours. The corrosion was measured by gravimetric measurements.
